# Supplementary material for: La12Sb9S38: a new semiconducting lanthanum antimony polysulfide with a mixed La/Sb site
Source: Royal Society of Chemistry journal article supplement (doi:10.1039/d1tc00984b), 2021-01-01
Supplement: d1tc00984b1.pdf [file d1tc00984b1.pdf]

# **La<sub>12</sub>Sb<sub>9</sub>S<sub>38</sub>: A New Semiconducting Lanthanum Antimony Polysulfide with a mixed La/Sb site**

Luke T. Menezes,<sup>a</sup> Zoltan W. Richter-Bisson,<sup>a</sup> Abdeljalil Assoud,<sup>a</sup> Holger Kleinke<sup>\*a</sup>

## **SUPPLEMENTARY INFORMATION**

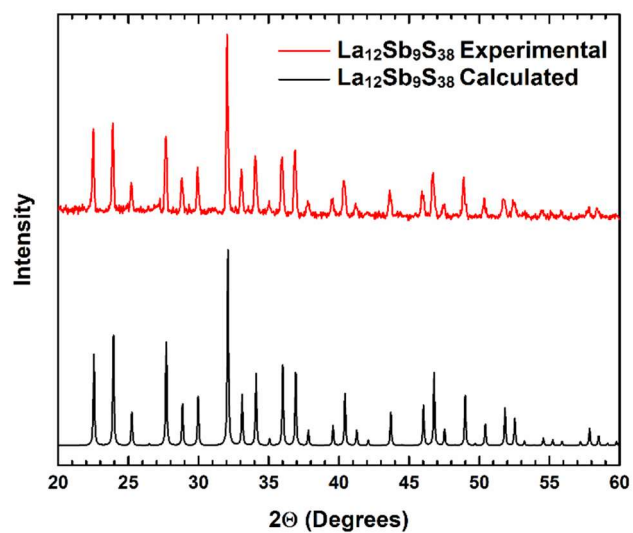

Figure S1. Experimental and calculated X-ray powder patterns of  $\text{La}_{12}\text{Sb}_9\text{S}_{38}$ .

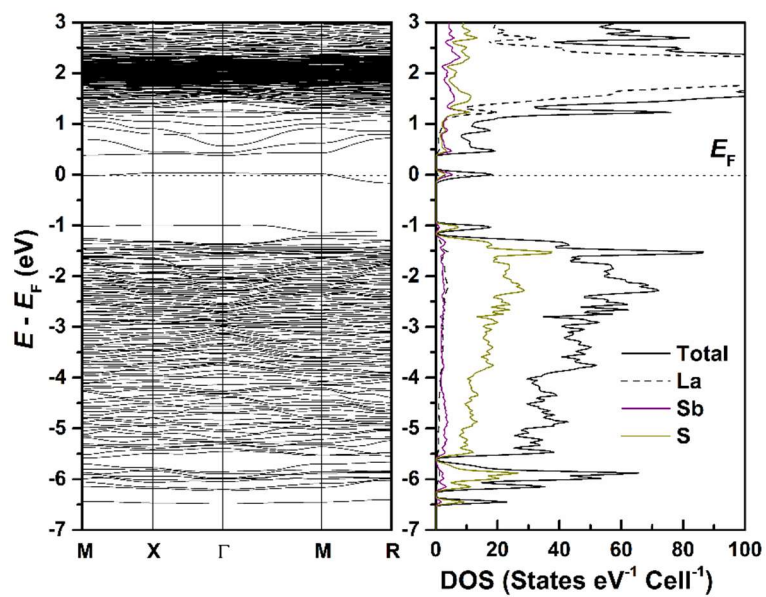

Figure S2. Band structure (left) and density of states (right) of  $\text{La}_{12}\text{Sb}_9\text{S}_{38}$ .

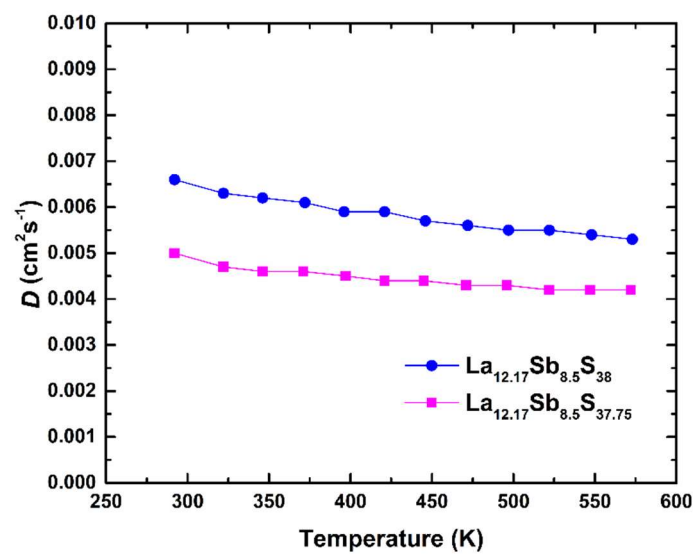

Figure S3. Thermal diffusivity of  $\text{La}_{12}\text{Sb}_9\text{S}_{38}$ .

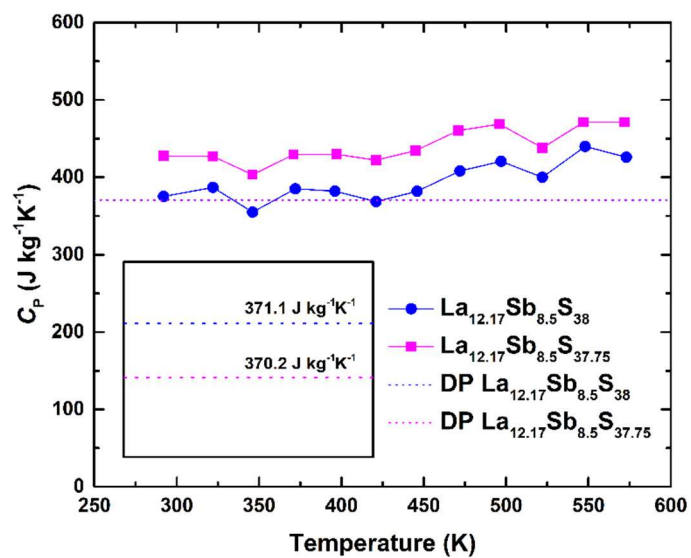

Figure S4. Specific heat of  $\text{La}_{12}\text{Sb}_9\text{S}_{38}$  in comparison to the Dulong-Petit (DP) limits.

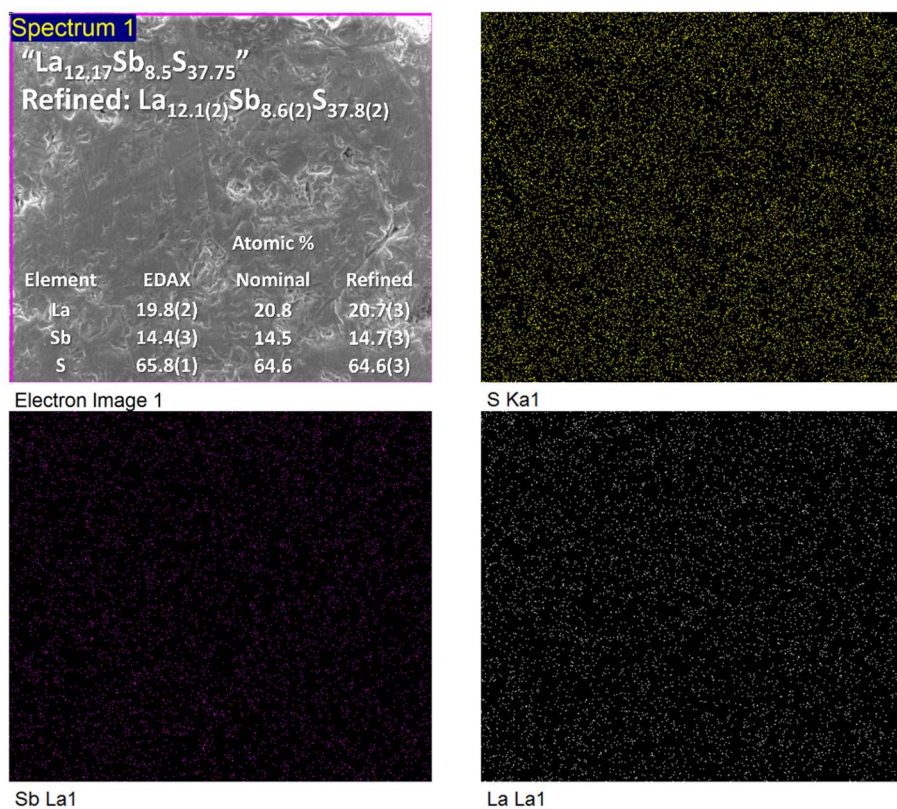

Figure S5. SEM maps and EDX results of the pellet of nominal composition  $\text{La}_{12.17}\text{Sb}_{8.5}\text{S}_{37.75}$  in comparison to the formula obtained from the Rietveld refinement.

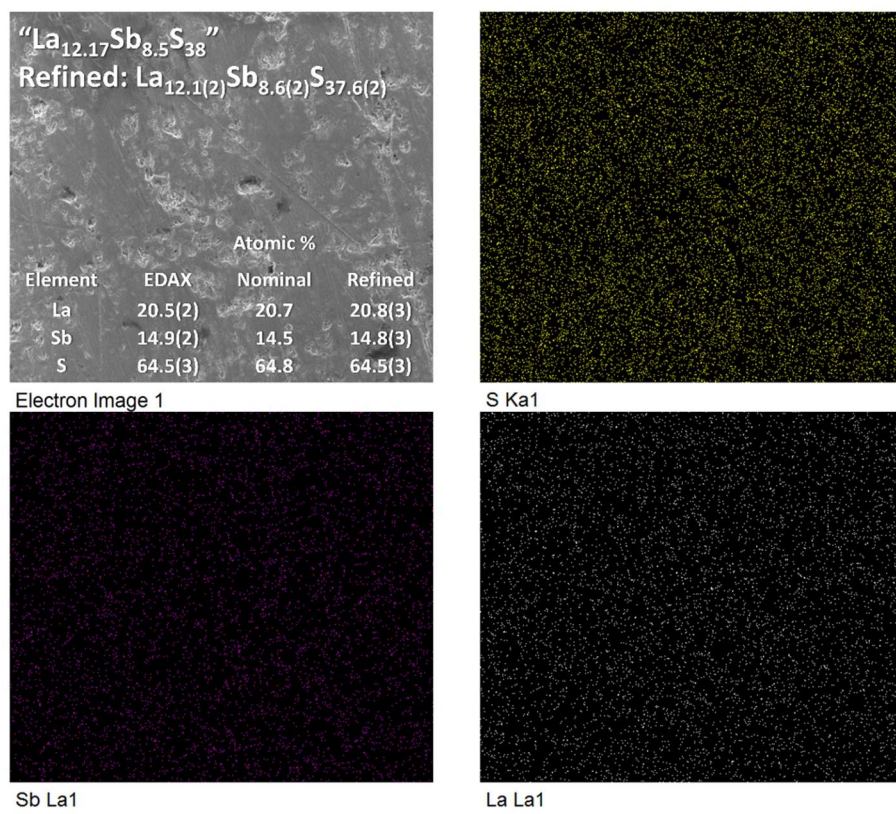

Figure S6. SEM maps and EDX results of the pellet of nominal composition La<sub>12.17</sub>Sb<sub>8.5</sub>S<sub>38</sub> in comparison to the formula obtained from the Rietveld refinement.

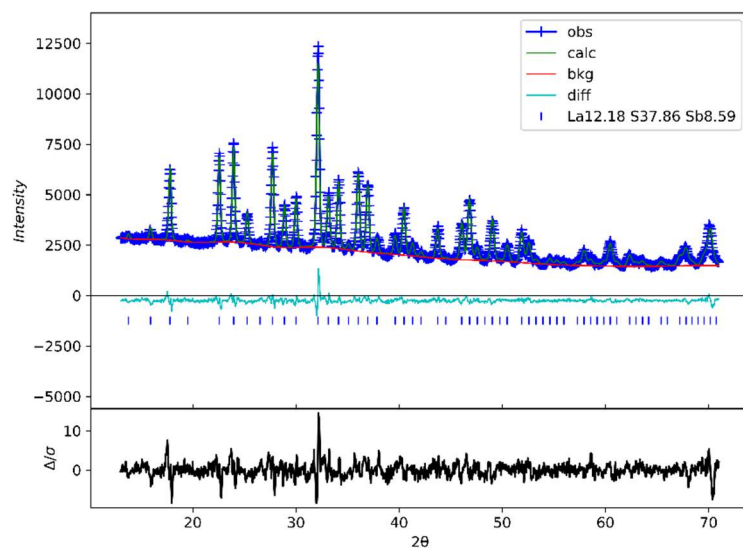

Figure S7. Rietveld refinement of the crushed and ground pellet of nominal composition  $\text{La}_{12.17}\text{Sb}_{8.5}\text{S}_{37.75}$ .

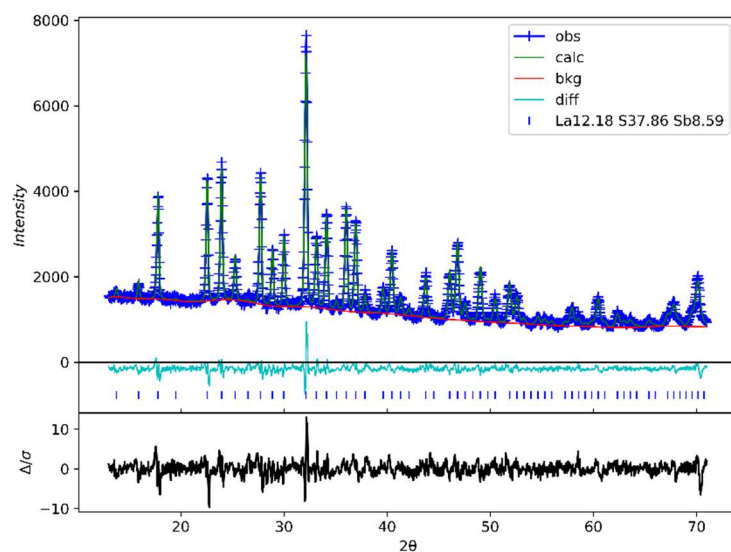

Figure S8. Rietveld refinement of the crushed and ground pellet of nominal composition  $\text{La}_{12.17}\text{Sb}_{8.5}\text{S}_{38}$ .
